# Supplementary material for: Microscopic measurements on the decomposition behaviour of methane hydrates formed in natural sands
Source: Royal Society of Chemistry journal article supplement (doi:10.1039/c9ra01611b), 2019-01-01
Supplement: c9ra01611b1.pdf [file c9ra01611b1.pdf]

## Electronic Supplementary Material (ESI) for RSC Advances.

Table S1 Main parameters of macroscopic experiment for hydrate formation in sediments

| Median granularity | Initial porosity | Hydrate saturation |
|--------------------|------------------|--------------------|
| 150 $\mu\text{m}$  | 42.11%           | 35.61%             |
| 87 $\mu\text{m}$   | 41.91%           | 34.32%             |
| 55 $\mu\text{m}$   | 38.13%           | 36.25%             |
| 38 $\mu\text{m}$   | 38.66%           | 35.01%             |
| 24 $\mu\text{m}$   | 38.04%           | 33.22%             |
| 13 $\mu\text{m}$   | 37.84%           | 32.43%             |

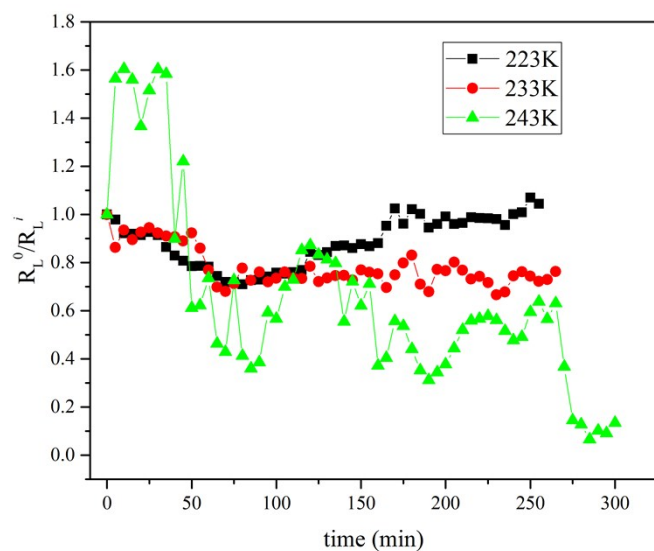

Fig.S1 Time-resolved integrated Raman intensity for the C-H stretching mode of  $\text{CH}_4$  in large cages ( $2902\text{ cm}^{-1}$ ) in bulk hydrate.

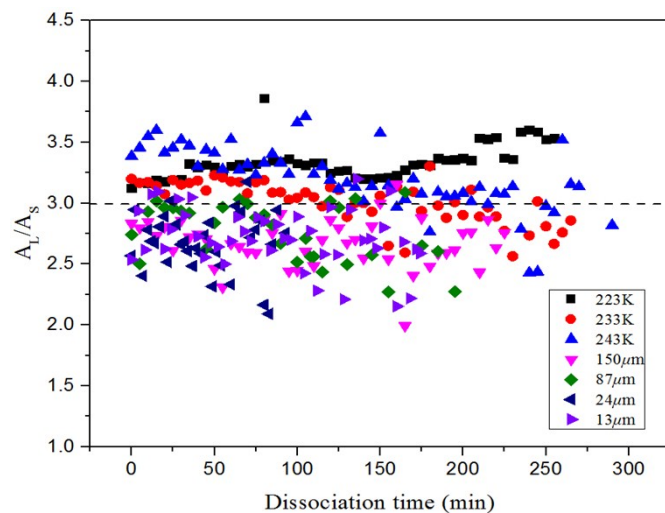

Fig. S2 Integrated intensity ratio of large to small cages for methane hydrate ( $A_L/A_S$ ) during dissociation.

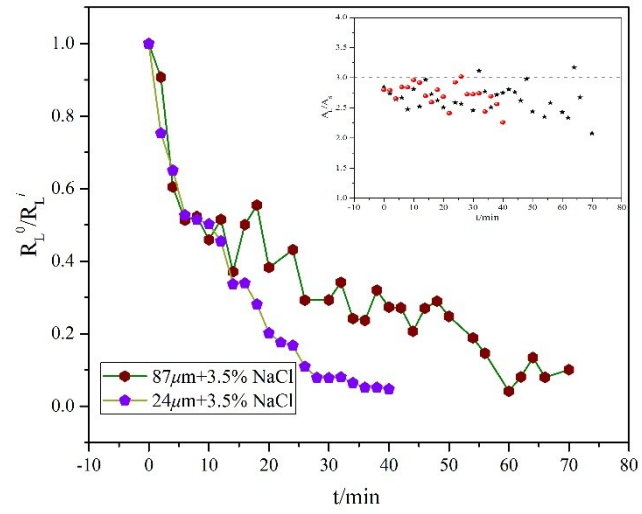

Fig. S3 Changes in  $R_L^0/R_L^i$  and  $AL/AS$  with time during hydrate decomposition in natural sand with 3.5% NaCl.
